# Supplementary material for: Comparative Transcriptome Analyses between Resistant and Susceptible Varieties in Response to Soybean Mosaic Virus Infection
Source: MDPI journal article supplement (doi:10.3390/agronomy12081785), 2022-07-28
Supplement: s1 [file s1]

**Table S1. Primers used for qRT-PCR validation**

| <b>Gene_ID</b>  | <b>Forward primer (5'-3')</b> | <b>Reverse primer (5'-3')</b> |
|-----------------|-------------------------------|-------------------------------|
| Glyma.03G219000 | CTAGATTGCAGGGATGCCAAG         | TCCCACCATTGTTTCTGAGCATA       |
| Glyma.13G267800 | TTACTGCGTCGAGTTTGCCA          | ACGATGATTGTGCAGGACGA          |
| Glyma.09G238300 | GGCACTCTTTGCCATTTCCA          | TCCTCGAGCATTGTGATGGG          |
| Glyma.18G035000 | ACTGGACACAAGGTGACGAA          | TCACGCCGAACTTGGGAGAT          |
| Glyma.12G183400 | AGGACCATTTTAATTGTTGGAGCC      | AGCTGATTTGGCATCCGAAG          |
| Glyma.11G222600 | GCCAAAGTGGAATCCACGAC          | CCATGTCTCTTCTCCTGCCG          |
| Glyma.18G061100 | CACCAAGAAACATGCCGCAA          | GCCCATTCTCAATTCGCCC           |
| Tubulin         | GGAGTTCACAGAGGCAGAG           | CACTTACGCATCACATAGCA          |

**Table S2. The quality and concentration measurements of RNA sample**

| <b>Number</b> | <b>Hpi</b> | <b>Sample number</b> | <b>Repeat</b> | <b>RIN</b> | <b>Concentration (ng/μL)</b> |
|---------------|------------|----------------------|---------------|------------|------------------------------|
| 1             | 0h         | NN-0h-1              | 1             | 7.3        | 615                          |
| 2             | 0h         | NN-0h-2              | 2             | 7.2        | 633                          |
| 3             | 0h         | NN-0h-3              | 3             | 7.3        | 669                          |
| 4             | 0h         | KF-0h-1              | 1             | 6.9        | 1038                         |
| 5             | 0h         | KF-0h-2              | 2             | 7.1        | 346                          |
| 6             | 0h         | KF-0h-3              | 3             | 6.5        | 209                          |
| 7             | 6h         | NN-6h-1              | 1             | 6.4        | 639                          |
| 8             | 6h         | NN-6h-2              | 2             | 6.2        | 981                          |
| 9             | 6h         | NN-6h-3              | 3             | 6.3        | 1065                         |
| 10            | 6h         | KF-6h-1              | 1             | 6.7        | 948                          |
| 11            | 6h         | KF-6h-2              | 2             | 6.8        | 1002                         |
| 12            | 6h         | KF-6h-3              | 3             | 6.4        | 735                          |
| 13            | 48h        | NN-48h-1             | 1             | 6.7        | 1089                         |
| 14            | 48h        | NN-48h-2             | 2             | 7.3        | 603                          |
| 15            | 48h        | NN-48h-3             | 3             | 7.3        | 615                          |
| 16            | 48h        | KF-48h-1             | 1             | 7.7        | 488                          |
| 17            | 48h        | KF-48h-2             | 2             | 7.7        | 669                          |
| 18            | 48h        | KF-48h-3             | 3             | 7.6        | 488                          |
| 19            | 5d         | NN-5d-1              | 1             | 6.6        | 440                          |
| 20            | 5d         | NN-5d-2              | 2             | 6.7        | 450                          |
| 21            | 5d         | NN-5d-3              | 3             | 7.4        | 428                          |
| 22            | 5d         | KF-5d-1              | 1             | 7.1        | 388                          |
| 23            | 5d         | KF-5d-2              | 2             | 7.3        | 434                          |
| 24            | 5d         | KF-5d-3              | 3             | 7.1        | 394                          |

**Table S3. Filtering and quality testing of raw data**

| <b>sample</b> | <b>RawDates</b> | <b>CleanDates(%)</b> | <b>CleanReads</b> | <b>AF-N<br/>(%)</b> | <b>AF-Q20<br/>(%)</b> | <b>AF-Q30<br/>(%)</b> | <b>AF-GC<br/>(%)</b> |
|---------------|-----------------|----------------------|-------------------|---------------------|-----------------------|-----------------------|----------------------|
| N-0h-1        | 38316550        | 38203520(99.71%)     | 38203520          | 0.00%               | 97.92%                | 93.84%                | 44.62%               |
| N-0h-2        | 37389334        | 37262492(99.66%)     | 37262492          | 0.00%               | 97.69%                | 93.34%                | 44.77%               |
| N-0h-3        | 39840346        | 39719024(99.70%)     | 39719024          | 0.00%               | 97.79%                | 93.56%                | 44.60%               |
| K-0h-1        | 38429302        | 38317066(99.71%)     | 38317066          | 0.00%               | 97.80%                | 93.56%                | 44.37%               |
| K-0h-2        | 38871420        | 38758548(99.71%)     | 38758548          | 0.00%               | 97.90%                | 93.76%                | 44.41%               |
| K-0h-3        | 50947114        | 50782582(99.68%)     | 50782582          | 0.00%               | 97.97%                | 93.91%                | 44.25%               |
| N-6h-1        | 52702614        | 52528690(99.67%)     | 52528690          | 0.00%               | 97.80%                | 93.54%                | 44.83%               |
| N-6h-2        | 37122540        | 36979958(99.62%)     | 36979958          | 0.00%               | 97.74%                | 93.42%                | 43.95%               |
| N-6h-3        | 36221774        | 36076218(99.60%)     | 36076218          | 0.00%               | 97.25%                | 92.37%                | 44.12%               |
| K-6h-1        | 47652768        | 47497958(99.68%)     | 47497958          | 0.00%               | 97.70%                | 93.19%                | 44.06%               |
| K-6h-2        | 41321860        | 41186074(99.67%)     | 41186074          | 0.00%               | 97.90%                | 93.71%                | 43.94%               |
| K-6h-3        | 36336686        | 36209812(99.65%)     | 36209812          | 0.00%               | 97.72%                | 93.31%                | 44.12%               |
| N-48h-1       | 45270514        | 45138286(99.71%)     | 45138286          | 0.00%               | 97.98%                | 93.92%                | 44.07%               |
| N-48h-2       | 41960744        | 41837188(99.71%)     | 41837188          | 0.00%               | 97.95%                | 93.83%                | 43.93%               |
| N-48h-3       | 43879010        | 43760292(99.73%)     | 43760292          | 0.00%               | 97.97%                | 93.86%                | 44.23%               |
| K-48h-1       | 46262956        | 46102148(99.65%)     | 46102148          | 0.00%               | 97.87%                | 93.67%                | 44.62%               |
| K-48h-2       | 40720914        | 40573796(99.64%)     | 40573796          | 0.00%               | 97.25%                | 92.32%                | 44.77%               |
| K-48h-3       | 45122878        | 44982208(99.69%)     | 44982208          | 0.00%               | 97.71%                | 93.36%                | 44.70%               |
| N-5d-1        | 46440676        | 46286008(99.67%)     | 46286008          | 0.00%               | 97.82%                | 93.57%                | 44.08%               |
| N-5d-2        | 41224732        | 41092568(99.68%)     | 41092568          | 0.00%               | 97.69%                | 93.31%                | 44.15%               |
| N-5d-3        | 43119928        | 42987632(99.69%)     | 42987632          | 0.00%               | 97.87%                | 93.71%                | 44.15%               |
| K-5d-1        | 50233860        | 50082364(99.70%)     | 50082364          | 0.00%               | 97.82%                | 93.59%                | 44.32%               |
| K-5d-2        | 44085528        | 43952372(99.70%)     | 43952372          | 0.00%               | 97.77%                | 93.45%                | 44.00%               |
| K-5d-3        | 48974382        | 48824674(99.69%)     | 48824674          | 0.00%               | 97.85%                | 93.61%                | 44.14%               |

**Tables S4. Statistics of RNA-Seq map**

| <b>Sample</b> | <b>Clean_Reads</b> | <b>Total_Mapped</b> | <b>Multiple_Mapped</b> | <b>Uniquely_Mapped</b> |
|---------------|--------------------|---------------------|------------------------|------------------------|
| N-0h-1        | 38203520           | 36192502(95.35%)    | 1688525(4.45%)         | 34503977(90.90%)       |
| N-0h-2        | 37262492           | 35181039(94.88%)    | 1586732(4.28%)         | 33594307(90.60%)       |
| N-0h-3        | 39719024           | 36989707(93.73%)    | 1736765(4.40%)         | 35252942(89.33%)       |
| K-0h-1        | 38317066           | 35607895(93.39%)    | 1817255(4.77%)         | 33790640(88.62%)       |
| K-0h-2        | 38758548           | 36685819(95.10%)    | 1861236(4.82%)         | 34824583(90.28%)       |
| K-0h-3        | 50782582           | 47808806(94.69%)    | 2417617(4.79%)         | 45391189(89.90%)       |
| N-6h-1        | 52528690           | 48760437(95.19%)    | 2789599(5.45%)         | 45970878(89.75%)       |
| N-6h-2        | 36979958           | 34876231(95.17%)    | 1609790(4.39%)         | 33266441(90.77%)       |
| N-6h-3        | 36076218           | 34232308(95.58%)    | 1556419(4.35%)         | 32675858(92.60%)       |
| K-6h-1        | 47497958           | 45397359(96.10%)    | 2148356(4.55%)         | 43249003(91.55%)       |
| K-6h-2        | 41186074           | 39600001(96.72%)    | 1710267(4.18%)         | 37889734(92.54%)       |
| K-6h-3        | 36209812           | 34419177(95.87%)    | 1544653(4.30%)         | 32874524(91.56%)       |
| N-48h-1       | 45138286           | 43039495(96.55%)    | 1807590(4.05%)         | 41231905(92.49%)       |
| N-48h-2       | 41837188           | 40387971(97.05%)    | 1661573(3.99%)         | 38726398(93.06%)       |
| N-48h-3       | 43760292           | 42293820(97.10%)    | 1692433(3.89%)         | 40601387(93.22%)       |
| K-48h-1       | 46102148           | 44608553(96.98%)    | 1578563(3.43%)         | 43029990(93.55%)       |
| K-48h-2       | 40573796           | 39071783(96.54%)    | 1404365(3.47%)         | 37667418(93.07%)       |
| K-48h-3       | 44982208           | 43348990(96.71%)    | 1636656(3.65%)         | 41712334(93.06%)       |
| N-5d-1        | 46286008           | 44301782(95.96%)    | 1338265(2.90%)         | 42963517(93.07%)       |
| N-5d-2        | 41092568           | 39384574(96.09%)    | 1091398(2.66%)         | 38293176(93.42%)       |
| N-5d-3        | 42987632           | 41032401(95.70%)    | 1132225(2.64%)         | 39900176(93.06%)       |
| K-5d-1        | 50082364           | 48123969(96.37%)    | 1468040(2.94%)         | 46655929(93.43%)       |
| K-5d-2        | 43952372           | 42067168(96.14%)    | 1293181(2.96%)         | 40773987(93.18%)       |
| K-5d-3        | 48824674           | 46509905(95.16%)    | 1526710(3.14%)         | 44983195(92.47%)       |

**Table S5. Comparison of regional statistics**

| <b>sample</b> | <b>Exon (%)</b>  | <b>Intron (%)</b> | <b>Intergenic (%)</b> |
|---------------|------------------|-------------------|-----------------------|
| N-0h-1        | 33800232(93.39%) | 1619608(4.47%)    | 772662(2.13%)         |
| N-0h-2        | 32927610(93.59%) | 1540904(4.38%)    | 712525(2.03%)         |
| N-0h-3        | 34564181(93.44%) | 1600245(4.33%)    | 825281(2.23%)         |
| K-0h-1        | 33320175(93.58%) | 1560920(4.38%)    | 726800(2.04%)         |
| K-0h-2        | 34327145(93.57%) | 1678575(4.58%)    | 680199(1.85%)         |
| K-0h-3        | 44696720(93.49%) | 2188078(4.58%)    | 924008(1.93%)         |
| N-6h-1        | 45046813(92.38%) | 2300996(4.72%)    | 1412628(2.90%)        |
| N-6h-2        | 32190829(92.30%) | 1925311(5.52%)    | 760091(2.18%)         |
| N-6h-3        | 31764263(92.79%) | 1796985(5.25%)    | 671060(1.96%)         |
| K-6h-1        | 42144693(92.84%) | 2456920(5.41%)    | 795746(1.75%)         |
| K-6h-2        | 36660504(92.58%) | 2231523(5.64%)    | 707974(1.79%)         |
| K-6h-3        | 31853472(92.55%) | 1886689(5.48%)    | 679016(1.97%)         |
| N-48h-1       | 39325921(91.37%) | 2819083(6.55%)    | 894491(2.08%)         |
| N-48h-2       | 36939425(91.46%) | 2684301(6.65%)    | 764245(1.89%)         |
| N-48h-3       | 38771504(91.67%) | 2757887(6.52%)    | 764429(1.81%)         |
| K-48h-1       | 41021592(91.96%) | 2861983(6.42%)    | 724918(1.63%)         |
| K-48h-2       | 36031145(92.22%) | 2421721(6.20%)    | 618917(1.58%)         |
| K-48h-3       | 39980804(92.23%) | 2681519(6.19%)    | 686667(1.58%)         |
| N-5d-1        | 4035203(91.08%)  | 3163120(7.14%)    | 788459(1.78%)         |
| N-5d-2        | 35991346(91.38%) | 2732169(6.94%)    | 661059(1.68%)         |
| N-5d-3        | 37444850(91.26%) | 2859885(6.97%)    | 727666(1.77%)         |
| K-5d-1        | 44124107(91.69%) | 3182650(6.61%)    | 817212(1.70%)         |
| K-5d-2        | 38318240(91.09%) | 2932403(6.97%)    | 816525(1.94%)         |
| K-5d-3        | 42427428(91.22%) | 3246867(6.98%)    | 835610(1.80%)         |

**Table S6. Function of candidate genes**

| <b>Gene ID</b>         | <b>Pathway</b>                                                                                | <b>Description</b>                                      | <b>GO Fuction</b>                                                  |
|------------------------|-----------------------------------------------------------------------------------------------|---------------------------------------------------------|--------------------------------------------------------------------|
| <i>Glyma.03G219000</i> | Plant hormone signal transduction; MAPK signaling pathway – plant                             | protein phosphatase 2C 37                               | catalytic activity; protein serine; threonine phosphatase activity |
| <i>Glyma.09g238300</i> | Unknown                                                                                       | gibberellin-regulated protein 4-like [Arachis ipaensis] | Unknown                                                            |
| <i>Glyma.11G222600</i> | Plant hormone signal transduction; MAPK signaling pathway – plant                             | protein phosphatase 2C 37                               | catalytic activity/protein serine; threonine phosphatase activity  |
| <i>Glyma.12G183400</i> | Peroxisome; Cutin, suberine and wax biosynthesis                                              | fatty acyl-CoA reductase 3 [Glycine max]                | fatty-acyl-CoA reductase (alcohol-forming) activity                |
| <i>Glyma.13G267800</i> | Folate biosynthesis                                                                           | gamma-glutamyl hydrolase isoform X1 [Glycine max]       | catalytic activity; omega peptidase activity                       |
| <i>Glyma.18G035000</i> | Plant hormone signal transduction; MAPK signaling pathway – plant                             | protein phosphatase 2C 37                               | catalytic activity; protein serine/threonine phosphatase activity  |
| <i>Glyma.18G061100</i> | Metabolic; Biosynthesis of secondary metabolites; Alanine, aspartate and glutamate metabolism | asparagine synthetase 1                                 | asparagine synthase (glutamine-hydrolyzing) activity               |
